# Supplementary material
Source: publisher figshare collection journal article supplement (https://aacr.figshare.com/articles/dataset/_/22430338)
Supplement: Supplementary file 1 [file 39876670]

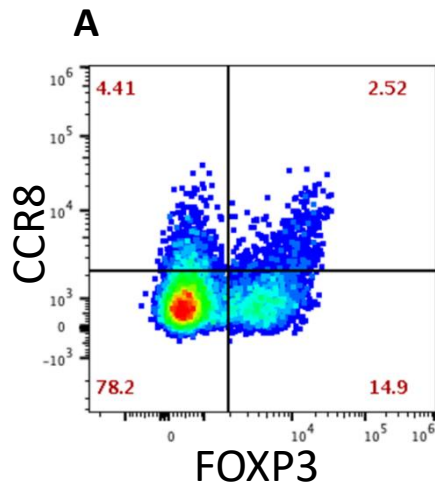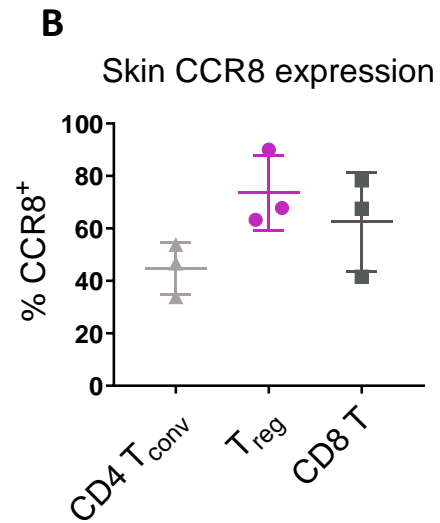

**Supplemental Figure 5: Human splenic and skin expressions of CCR8**

Representative flow cytometric plot of splenic expression of CCR8 on CD4<sup>+</sup> T cell populations (A). Human skin expression of CCR8 on T cell subsets ( $n=3$  healthy donor patients) (B).
